# Supplementary material for: NLRP3 Inflammasome and Mineralocorticoid Receptors Are Associated with Vascular Dysfunction in Type 2 Diabetes Mellitus
Source: PubMed Central journal article supplement (PMC6952964; doi:10.3390/cells8121595), 2019-12-08
Supplement: cells-08-01595-s001.pdf [file cells-08-01595-s001.pdf]

1 **NLRP3 inflammasome and mineralocorticoid receptor are associated with**  
2 **vascular dysfunction in type 2 diabetes mellitus**

3  
4 Nathanne S Ferreira<sup>1\*</sup>, Thiago Bruder-Nascimento<sup>1</sup>, Camila A Pereira<sup>1</sup>, Camila Z Zanotto<sup>1</sup>,  
5 Douglas S Prado<sup>1</sup>, Josiane F Silva<sup>1</sup>, Diane M Rassi<sup>1</sup>, Maria Cristina Foss-Freitas<sup>2</sup>, Jose C  
6 Alves-Filho<sup>1,3</sup>, Daniela Carlos<sup>3</sup>, Rita C Tostes<sup>1\*</sup>

7  
8 Departments of <sup>1</sup>Pharmacology, <sup>2</sup>Clinical Medicine, Division of Endocrinology, and  
9 <sup>3</sup>Biochemistry and Immunology, Ribeirao Preto Medical School, University of Sao Paulo,  
10 Ribeirao Preto, SP, Brazil.

11  
12 **\*Corresponding authors**

13 Rita C Tostes / Nathanne dos Santos Ferreira  
14 Department of Pharmacology  
15 Ribeirao Preto Medical School, University of Sao Paulo,  
16 Av Bandeirantes 3900,  
17 Ribeirao Preto, São Paulo 14049-900, Brazil.  
18 Tel: +55 16 3315-3181  
19 e-mail: [rtostes@usp.br](mailto:rtostes@usp.br) / [nathanferre@hotmail.com](mailto:nathanferre@hotmail.com)

20  
21 **SUPPLEMENTARY METHODS**

22 **Oral Glucose Tolerance Test**

23 Control and type 2 diabetes mice were treated with the NLRP3 selective inhibitor MCC950 (10  
24 mg/kg/ day, intraperitoneal injections) or respective vehicle for 2 weeks and at the end of the  
25 treatment, the animals were fasted for 8 h and fasting glycaemia was determined, characterizing  
26 the time 0. After fasting glucose determination, a glucose overload at the dose of 2 g/kg was  
27 administered, per gavage, to the animals. New blood samples were taken to determine the blood  
28 glucose at 15, 30, 60, 90 and 120 minutes (min) after glucose administration. Blood was  
29 collected after cutting at the tip of the tail and placed in individual tapes and the reading was  
30 performed on a glucometer Accu-Chek Active® (Roche Diagnostics, Mannheim, Germany).

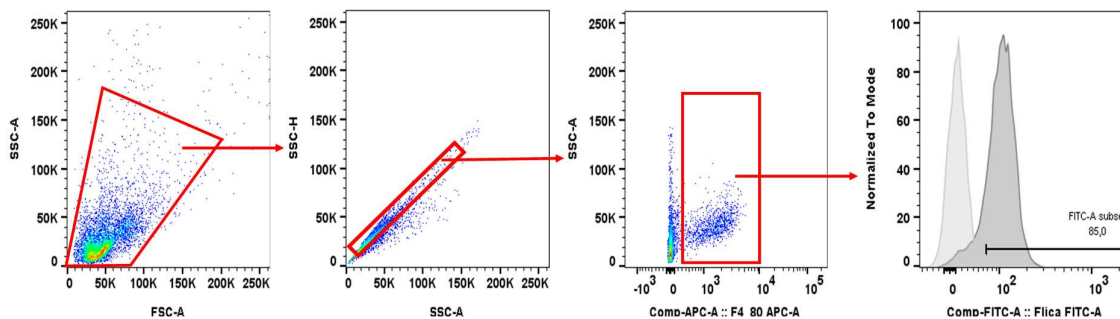

31

32 **SUPPLEMENTARY FIGURE 1. Flow cytometry gating strategy for caspase-1 activity**  
 33 **in macrophages of the peritoneal lavage.** Activity of caspase-1 in macrophages was  
 34 determined by flow cytometry in the peritoneal lavage of control and db/db mice treated with  
 35 vehicle or spironolactone for 6 weeks as indicated in the text. Total cells were stained with  
 36 allophycocyanin (APC) and FAM-FLICA® Caspase-1 (FAM-YVAD-FMK). Fluorophores  
 37 were respectively excited and analyzed with the appropriate laser and band pass filter (BP):  
 38 (FITC 492 nm with 520 nm and APC 633-647 nm with 660 nm). A representative Flow  
 39 Cytometry profile of macrophages in db/db mice vehicle after 6 weeks of treatment  
 40 demonstrating the gating strategy. The macrophages were gated in the side scatter area (SSC-  
 41 A)/forward scatter area (FSC-A) plot. Singlet cells were gated using SSC-A over SSC-wide  
 42 (SSC-W). Macrophages (F4/80<sup>+</sup>) were gated in the SSC-A and positive caspase-1 were in  
 43 histogram from the F4/80<sup>+</sup>.

44

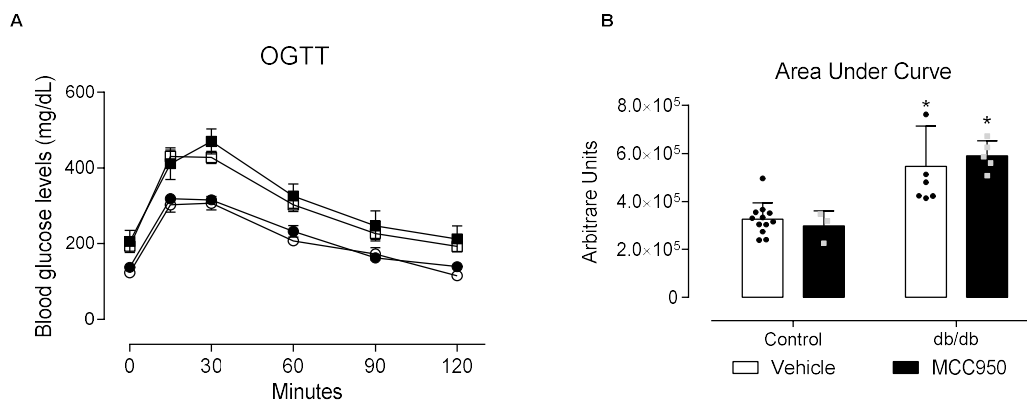

45 **SUPPLEMENTARY FIGURE 2. Treatment with the NLRP3 inhibitor does not alter**  
 46 **glucose tolerance in db/db mice.** Oral Glucose Tolerance Test (OGTT) (A) and Area Under  
 47 Curve of the Oral Glucose Tolerance Test (B) in control and db/db mice treated with vehicle  
 48 or MCC950 (10 mg/Kg/day) for 2 weeks (n=3-7 mice per group). Data represent the mean  $\pm$   
 49 S.E.M. Two-way ANOVA with Bonferroni post-test,  $p < 0.05$  \* vs. control.

50

51

52 **SUPPLEMENTARY TABLE S1.** pD<sub>2</sub> values of PE-induced maximal contraction and ACh-  
 53 induced relaxation in mesenteric arteries of diabetic and control mice treated or incubated with  
 54 vehicle spironolactone or MCC950.

|                                     | Control                         |                                | db/db                              |                                |
|-------------------------------------|---------------------------------|--------------------------------|------------------------------------|--------------------------------|
|                                     | <i>pD</i> <sub>2</sub> PE       | <i>pD</i> <sub>2</sub> ACh     | <i>pD</i> <sub>2</sub> PE          | <i>pD</i> <sub>2</sub> ACh     |
| <b>Vehicle</b>                      | 6.7 ± 0.06<br>n=8               | 7.2 ± 0.15<br>n=6              | 6.6 ± 0.08 <sup>&amp;</sup><br>n=9 | 6.2 ± 0.29*<br>n=7             |
| <b>Spironolactone<br/>(6 weeks)</b> | 6.2 ± 0.12*<br>n=4              | 7.4 ± 0.16<br>n=4              | 6.3 ± 0.07<br>n=5                  | 7.1 ± 0.22 <sup>†</sup><br>n=4 |
| <b>Vehicle</b>                      | 6.6 ± 0.08<br>n=6               | 7.3 ± 0.07<br>n=10             | 6.7 ± 0.15<br>n=6                  | 6.7 ± 0.19*<br>n=10            |
| <b>MCC950<br/>(1 hour)</b>          | 6.1 ± 0.06* <sup>†</sup><br>n=6 | 7.1 ± 0.07<br>n=6              | 6.7 ± 0.08<br>n=4                  | 7.1 ± 0.18<br>n=4              |
| <b>Vehicle</b>                      | 6.6 ± 0.12<br>n=5               | 7.3 ± 0.14<br>n=4              | 6.6 ± 0.06<br>n=4                  | 6.6 ± 0.26<br>n=5              |
| <b>MCC950<br/>(2 weeks)</b>         | 6.7 ± 0.08<br>n=4               | 7.5 ± 0.07 <sup>#</sup><br>n=4 | 6.5 ± 0.09<br>n=5                  | 7.2 ± 0.14<br>n=5              |

55 Data represent the mean ± S.E.M (n= 4-10 mice per group). Two-way ANOVA with  
 56 Bonferroni post-test, p < 0.05 \* vs. control vehicle; & vs. Control Spironolactone; † vs. db/db  
 57 vehicle and # vs. db/db vehicle. MCC950: NLRP3 inhibitor, PE: phenylephrine, ACh:  
 58 acetylcholine.  
 59

60

61

62 **SUPPLEMENTARY TABLE S2.** Maximal responses to PE and ACh in mesenteric arteries  
 63 from control and db/db mice treated with spironolactone or MCC950 and in arteries from  
 64 control mice incubated with vehicle or NLRP3 inhibitor or aldosterone.

|                                     | Control            |                    | db/db              |                                 |
|-------------------------------------|--------------------|--------------------|--------------------|---------------------------------|
|                                     | <b>R</b> max PE    | <b>R</b> max ACh   | <b>R</b> max PE    | <b>R</b> max ACh                |
| <b>Vehicle</b>                      | 134.6 ± 3.2<br>n=8 | 76.4 ± 3.8<br>n=6  | 141.7 ± 4.7<br>n=9 | 53.4 ± 6.1*<br>n=7              |
| <b>Spironolactone<br/>(6 weeks)</b> | 138.6 ± 7.1<br>n=4 | 75.3 ± 4.5<br>n=4  | 129.8 ± 3.9<br>n=4 | 63.8 ± 4.7<br>n=4               |
| <b>Vehicle</b>                      | 153.8 ± 5.3<br>n=6 | 91.3 ± 2.3<br>n=10 | 154.3 ± 9.7<br>n=6 | 44.1 ± 3.2*<br>n=10             |
| <b>MCC950<br/>(1 hour)</b>          | 142.5 ± 4.3<br>n=6 | 95.9 ± 2.5<br>n=6  | 150.3 ± 5.5<br>n=4 | 71.9 ± 4.5* <sup>†</sup><br>n=4 |
| <b>Vehicle</b>                      | 137.6 ± 6.6        | 89.4 ± 3.9         | 133.0 ± 3.5        | 52.1 ± 4.9*                     |

|                  |             |            |             |             |
|------------------|-------------|------------|-------------|-------------|
|                  | n=5         | n=4        | n=5         | n=5         |
| <b>MCC950</b>    | 146.4 ± 4.8 | 98.4 ± 2.3 | 135.1 ± 5.2 | 83.5 ± 4.0† |
| <b>(2 weeks)</b> | n=4         | n=4        | n=5         | n=5         |

65 Data represent the mean ± S.E.M (n= 4-10 mice per group). Two-way ANOVA with  
66 Bonferroni post-test,  $p < 0.05$  \* vs. control vehicle; and †vs. db/db vehicle. MCC950: NLRP3  
67 inhibitor, PE: phenylephrine, ACh: acetylcholine.  
68
